# Supplementary material for: An electrochemical sensing platform based on carbon black and chitosan-stabilized platinum nanoparticles
Source: Royal Society of Chemistry journal article supplement (doi:10.1039/d2ay01964g), 2023-01-01
Supplement: d2ay01964g1.pdf [file d2ay01964g1.pdf]

**SUPPLEMENTARY MATERIAL FOR THE PAPER**

**Electrochemical sensing platform based on carbon black and chitosan-stabilized  
platinum nanoparticles**

Tiago Almeida Silva<sup>a, b, \*</sup>, Bruna Claudia Lourencao<sup>a, c</sup>, Alexsandra Dias da Silva<sup>b</sup>, Orlando  
Fatibello-Filho<sup>a</sup>

<sup>a</sup>Department of Chemistry, Federal University of São Carlos, 13560-970, São Carlos, SP,  
Brazil.

<sup>b</sup>Department of Chemistry, Federal University of Viçosa, 36570-900, Viçosa, MG, Brazil.

<sup>c</sup>Minas Gerais State University, 38302-192, Ituiutaba, MG, Brazil.

\*Corresponding author:

Prof. Dr. Tiago Almeida Silva

Tel.: +55 31 3612-6611

E-mail address: [tiago.a.silva@ufv.br](mailto:tiago.a.silva@ufv.br)

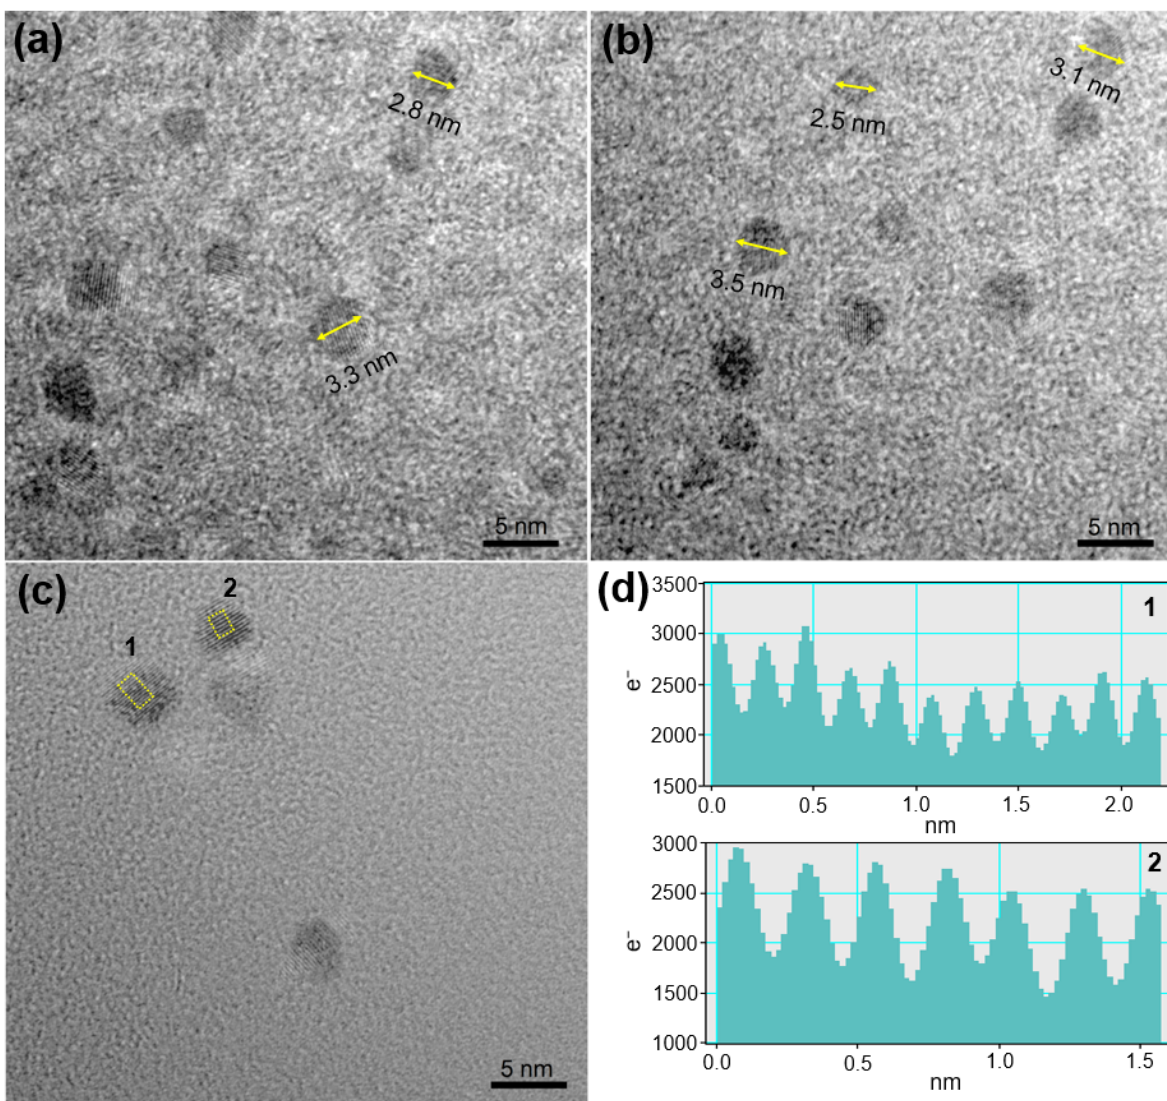

**Figure S1.** (a-c) HR-TEM images obtained for Ch-PtNPs. (d) Profile of planes spacing of Ch-PtNPs 1 and 2 marked in (c).

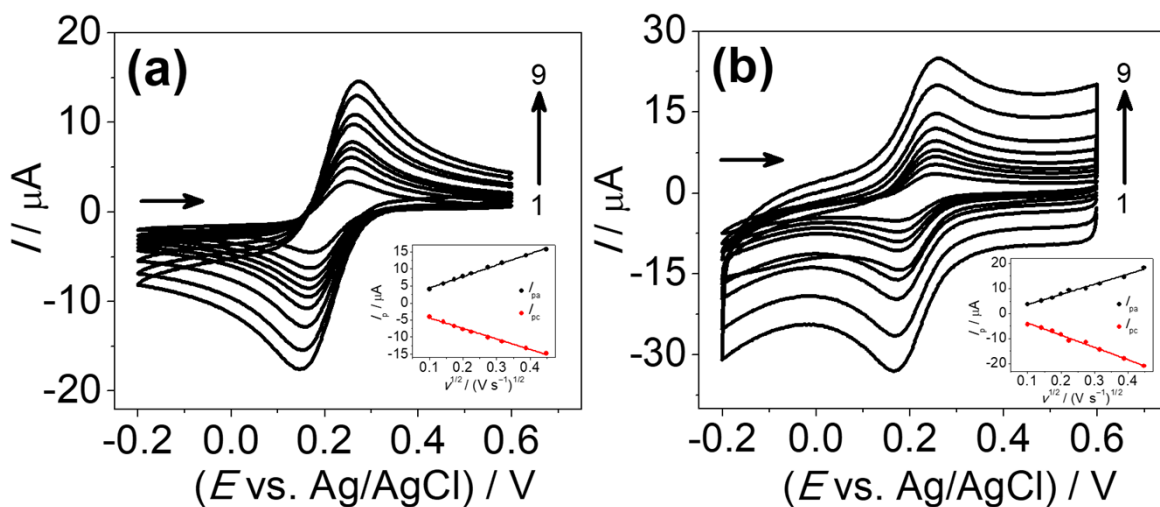

**Figure S2.** Cyclic voltammograms recorded using (a) GCE and (b) CB-Ch-PtNPs/GCE for  $1.0 \times 10^{-3} \text{ mol L}^{-1} \text{ K}_3\text{Fe}(\text{CN})_6$  in  $0.1 \text{ mol L}^{-1} \text{ KCl}$  solution at different potential scan rates ( $\nu$ ): (1) 10, (2) 20, (3) 30, (4) 40, (5) 50, (6) 75, (7) 100, (8) 150 and (9) 200  $\text{mV s}^{-1}$ . Insets: Graphics of  $I_{pa}$  vs.  $\nu^{1/2}$  and  $I_{pc}$  vs.  $\nu^{1/2}$ .

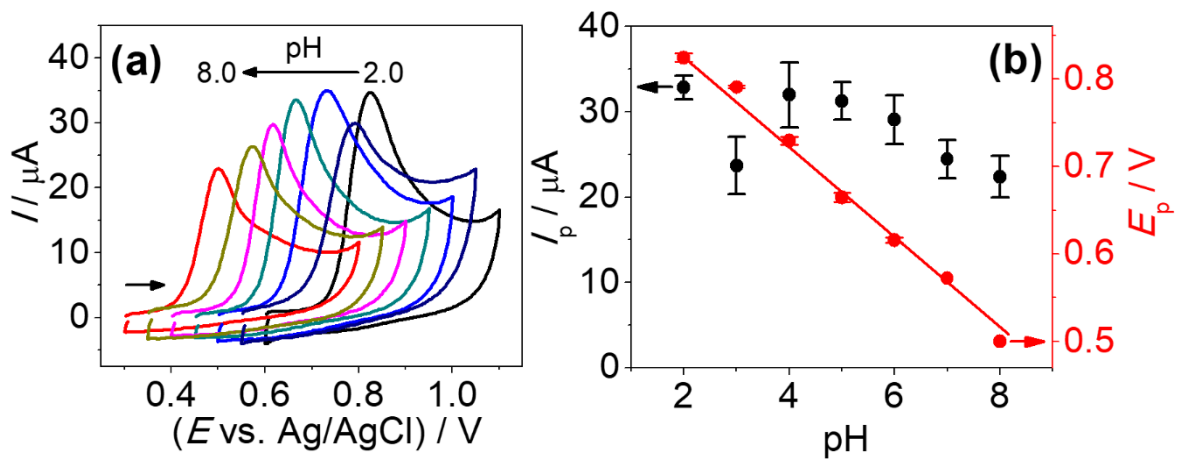

**Figure S3. (a)** CV recorded using CB-Ch-PtNPs/GCE for  $1.0 \times 10^{-4} \text{ mol L}^{-1}$  BPA in  $0.2 \text{ mol L}^{-1}$  phosphate buffer solutions at different pHs (2.0, 3.0, 4.0, 5.0, 6.0, 7.0 and 8.0) (pH 7.0).  $v = 50 \text{ mV s}^{-1}$ . **(b)** Graphics of  $E_p$  vs. pH and  $I_p$  vs. pH obtained for BPA.

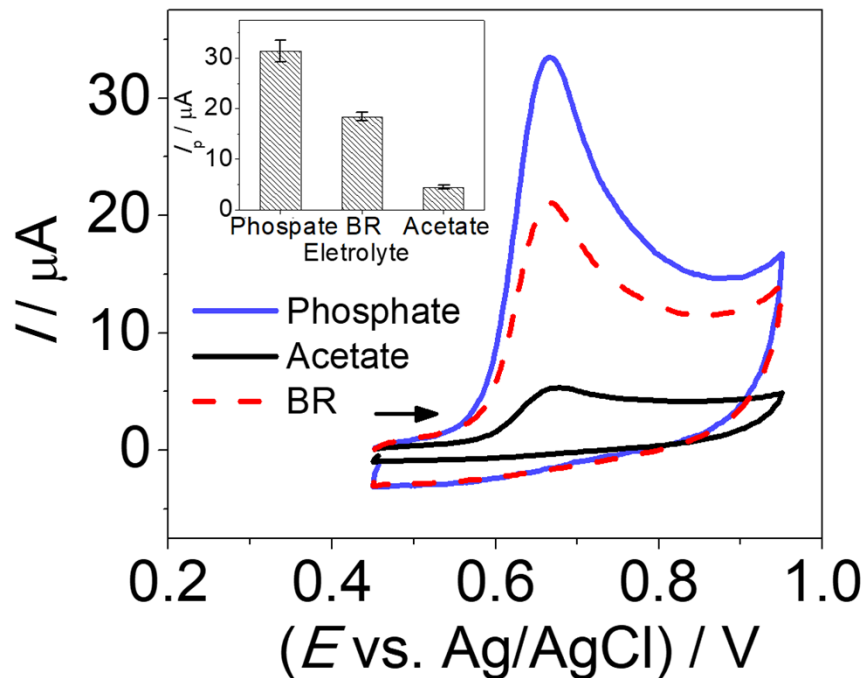

**Figure S4.** Cyclic voltammogram recorded using CB-Ch-PtNPs/GCE for  $1.0 \times 10^{-4} \text{ mol L}^{-1}$  BPA at different supporting electrolytes:  $0.2 \text{ mol L}^{-1}$  phosphate buffer solution (pH = 5.0),  $0.2 \text{ mol L}^{-1}$  BR buffer solution (pH = 5.0) and  $0.2 \text{ mol L}^{-1}$  acetate buffer solution (pH = 5.0).  $\nu = 50 \text{ mV s}^{-1}$ . Inset: Graphics of  $I_p$  vs. Electrolyte.

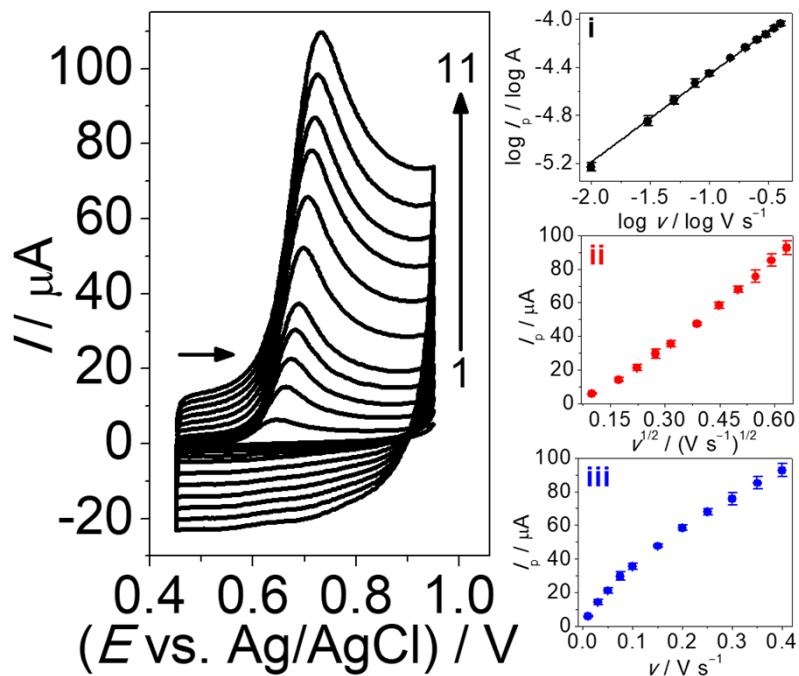

**Figure S5.** Cyclic voltammograms recorded using CB-Ch-PtNPs/GCE for  $1.0 \times 10^{-4}$  mol  $\text{L}^{-1}$  BPA in  $0.2 \text{ mol L}^{-1}$  phosphate buffer solution (pH = 5.0) at different potential scan rates ( $v$ ): (1) 10, (2) 20, (3) 30, (4) 40, (5) 50, (6) 75, (7) 100, (8) 150, (9) 200, (10) 250 and (11) 300  $\text{mV s}^{-1}$ . Graphics of (i)  $\log I_p$  vs.  $\log v$ , (ii)  $I_p$  vs.  $v^{1/2}$  and (iii)  $I_p$  vs.  $v$ .

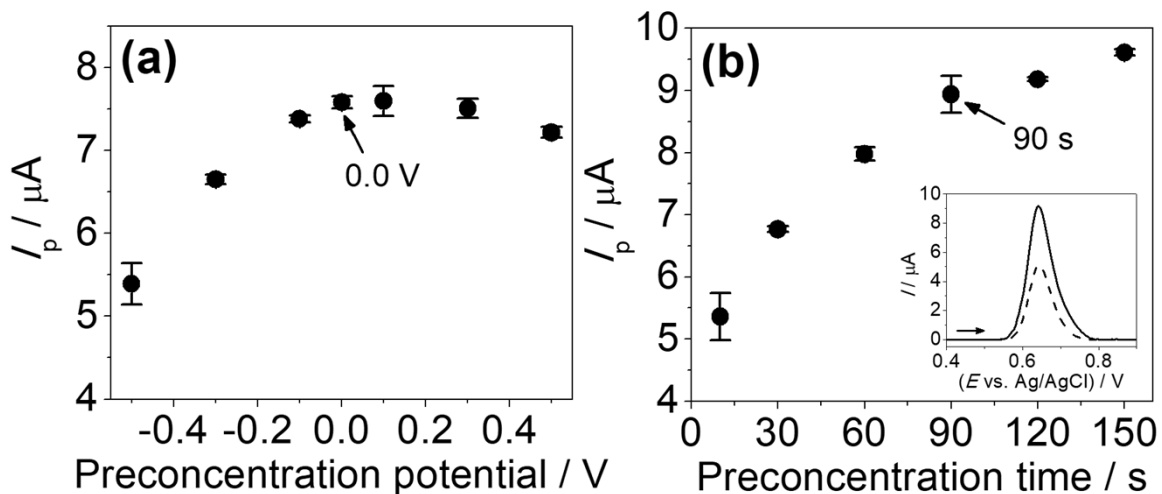

**Figure S6.** Effect of (a) preconcentration potential (range of  $-0.5$  V to  $+0.5$  V and fixed preconcentration time = 30 s) and (b) preconcentration time (range of 10 to 150 s and fixed preconcentration potential = 0.0 V) applied in the DPAdASV measurements recorded using CB-Ch-PtNPs/GCE for  $1.0 \times 10^{-5}$  mol L $^{-1}$  BPA in 0.2 mol L $^{-1}$  phosphate buffer solution (pH = 5.0).  $\nu = 10$  mV s $^{-1}$ ;  $a = 60$  mV and  $t_m = 50$  ms. Inset: Comparison of BPA response with (—) and (---) without preconcentration.

**Table S1.** Effect of possible interferences on the determination of BPA by DPAdASV using the CB-Ch-PtNPs/GCE sensor

| <b>Interfering</b>                                                                                       | <b><i>c</i>(BPA): <i>c</i>(Interferent) ratio</b> | <b>RSD (%)</b> |
|----------------------------------------------------------------------------------------------------------|---------------------------------------------------|----------------|
| Cations (Ca <sup>2+</sup> , Mg <sup>2+</sup> and Ba <sup>2+</sup> )                                      | 1:10                                              | -1.1           |
|                                                                                                          | 1:100                                             | +2.8           |
| Anions (CO <sub>3</sub> <sup>2-</sup> , NO <sub>3</sub> <sup>-</sup> and SO <sub>4</sub> <sup>2-</sup> ) | 1:10                                              | +1.6           |
|                                                                                                          | 1:100                                             | -3.0           |
| Hydroquinone                                                                                             | 1:10                                              | -0.64          |
|                                                                                                          | 1:100                                             | +5.2           |
| Catechol                                                                                                 | 1:10                                              | +1.4           |
|                                                                                                          | 1:100                                             | -0.89          |
| Humic acid                                                                                               | ---                                               | -5.0           |
| Vermicompost                                                                                             | ---                                               | +2.5           |
